# Supplementary material
Source: Springer Nature journal article supplement (https://www.springermedizin.de/resource/supplementary/12913_2010_1884_MOESM1_ESM.pdf/9529156)

Panel A Alberta 1995-2001

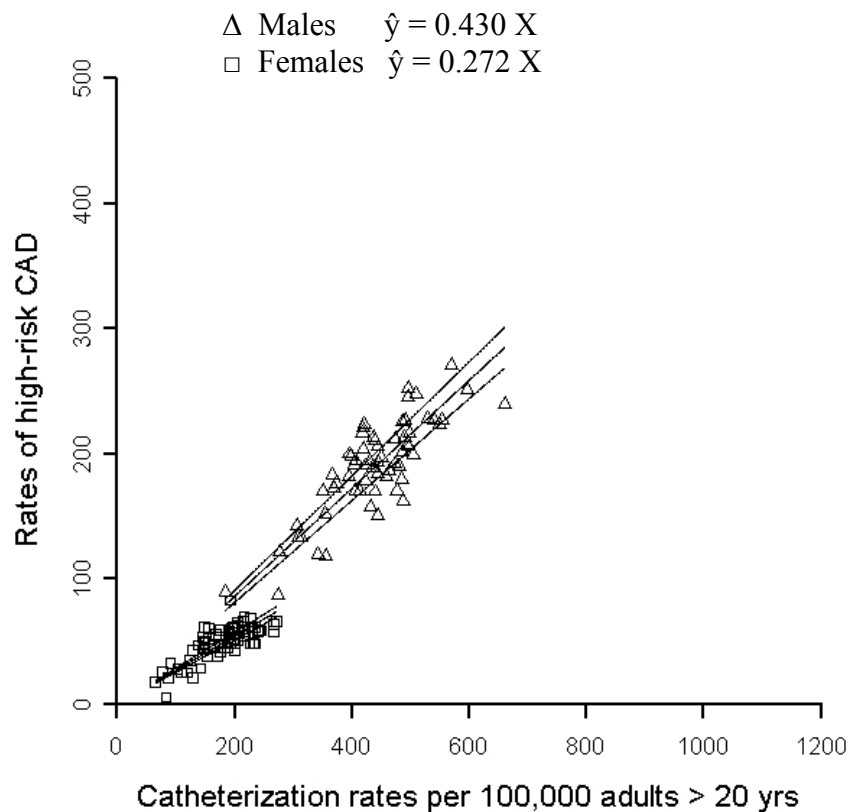

Panel B Alberta 2002-2006

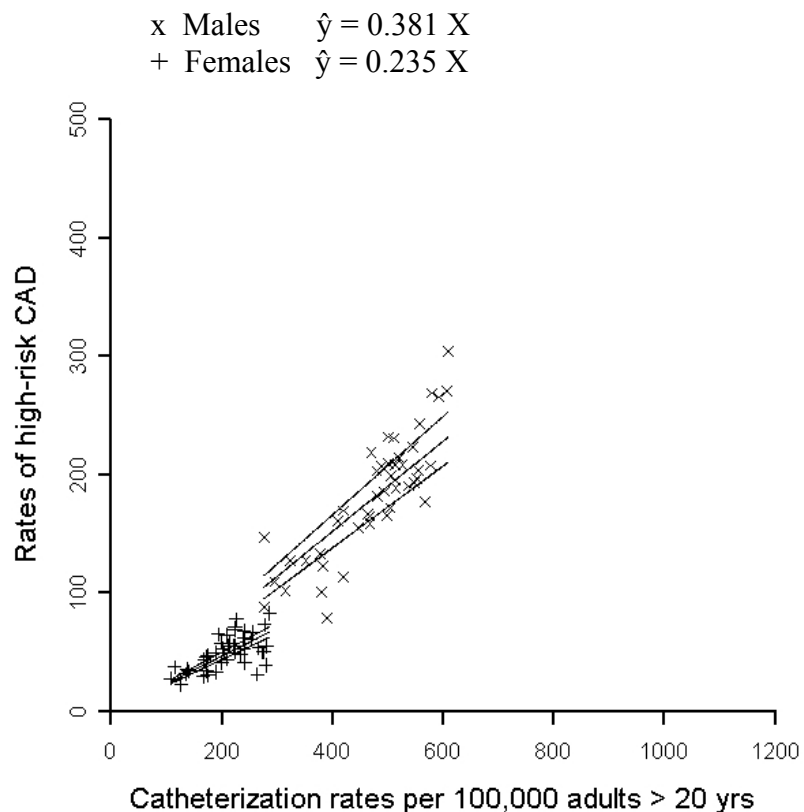

Supplement: MOESM1 [file 9529156]
